# Supplementary material
Source: Springer Nature journal article supplement (https://www.springermedizin.de/resource/supplementary/12913_2013_3743_MOESM5_ESM.pdf/9532298)
Supplement: MOESM5 [file 9532298]

| Variables                        | Village health volunteer |                            | Health center staff   |                            |
|----------------------------------|--------------------------|----------------------------|-----------------------|----------------------------|
|                                  | Adjusted<br>odd ratio    | 95% Confidence<br>interval | Adjusted<br>odd ratio | 95% Confidence<br>interval |
| <b>Structural social capital</b> |                          |                            |                       |                            |
| group membership                 | 0.89                     | 0.60-1.32                  | 1.05                  | 0.73-1.51                  |
| support from groups              | 1.87                     | 1.27-2.76                  | 1.29                  | 0.92-1.80                  |
| support from individuals         | 0.78                     | 0.59-1.04                  | 0.84                  | 0.66-1.08                  |
| citizenship activities           | 2.10                     | 1.19-3.71                  | 1.67                  | 1.01-2.77                  |
| <b>Cognitive social capital</b>  |                          |                            |                       |                            |
| cognitive social capital         | 7.48                     | 2.14-26.10                 | 1.28                  | 0.65-2.52                  |

\* Adjusted by Age, Distance between village and health center, Education attainment, Number of training sessions attended
